# Gender, Securitization and Transit: Refugee Women and the Journey to the EU

---

ALISON GERARD

*School of Humanities and Social Sciences, Charles Sturt University, Bathurst, NSW Australia*  
agerard@csu.edu.au

SHARON PICKERING

*School of Political and Social Inquiry, Monash University, Victoria 3800, Australia*

*MS received October 2012; revised MS received April 2013*

European Union (EU) Member States have cultivated the ‘securitization of migration’, crafting a legal framework that prevents irregular migrants, including asylum seekers, from arriving in the EU. As external and internal border controls are reinvigorated to achieve this aim, the experiences of asylum seekers beyond the EU border, in designated ‘transit’ countries, necessitate further inquiry. Concepts of ‘transit’ are shaped by government accounts of ‘secondary migration’ as illegitimate, and asylum seekers as a security threat warranting containment. Based on interviews with Somali refugee women who have travelled through North Africa to reach the southern EU Member State of Malta, this article traces the impact of the securitization of migration on women’s experiences of ‘transit’. Women’s stories, historically neglected in the literature on migration, provide a lived account of securitization and the gendered ways ‘functional border sites’ operate beyond the EU, enlisting state and non-state actors in producing direct and structural violence. This article argues EU policy is blind to the lived realities of those who seek refugee protection in the EU, and urgently needs to address the structural contradictions exacerbating violence experienced by refugee women in transit.

Keywords: gender and irregular migration, securitization of migration, transit, border control

## Introduction

One of the objectives of the European Union is the gradual creation of an area of freedom, security and justice, which means, inter alia, that illegal immigration must be combated (EC 2002: 62).

As this statement from a European Union (EU) Directive on unauthorized arrival makes clear, the battle against irregular migration is intrinsic to the EU project of creating an area of ‘freedom, security and justice’. Huysmans

(2006: 64) sets out three themes that he argues are part of the EU's 'multi-dimensional process' of securitizing migration: internal security, cultural identity and the crisis of the welfare state. Securitization uses many 'techniques of government' (Foucault 1991) to permeate migration, three of which are central (Huysmans 2006). First, securitization seeps into policy development and implementation. Second, securitization is mobilized through political discourse that exaggerates the risks of migration and asylum. Third, securitization constructs migration as a security problem and poses security solutions as the only viable remedy.

Based on interviews with refugee women who have travelled through North Africa to reach the southern EU Member State of Malta, this article traces the impact of the securitization of migration on women's experiences of 'transit'. Refugee women's narratives reveal the structural contradictions between the securitization of migration and refugee protection. EU policy on transit indirectly sustains a cycle of violence on mobility pathways between North Africa and the EU.

Scholars have drawn attention to the loaded use of terminology in irregular migration research (Kapur 2005; Pickering 2011: 11). In this research we use the term 'irregular migration' to refer to the phenomenon of people crossing borders outside accepted legal pathways. Specifically, we refer to participants in this research as 'refugee women', defined as those who have received some form of humanitarian protection status, be it temporary, subsidiary or Convention status (see Gerard and Pickering 2012: 518). More generally, the term 'illegalized traveller' (Weber and Pickering 2011) will be used to refer to those asylum seekers, refugees and other migrants who have fallen outside of the narrow legal migration categories recognized by states. 'Transit' is a similarly politically charged term that has risen to prominence within discourses of 'migration management' (Oelgemöller 2010). Oelgemöller has traced this emergence among inter-governmental working groups since the 1980s. The term 'transit country', she argues, has a political function immersed in an 'us and them' binary, which is 'conceptually undecided about whether to formulate itself as a security/threat or a development/humanitarian discourse, or both' (Oelgemöller 2010: 408). This has contributed to the development of language around 'secondary migration' that delegitimizes this concept; only the migration from country of origin to the first 'transit country' is presumed to be legitimate. In this research, 'transit' is taken to mean the journey from the point of exit, in this case Somalia, to the point of arrival in the EU, in this case Malta. This geographical limitation is adopted because refugee women interviewed in Malta spoke about transit as having a separate, albeit intersecting, relationship to the rest of their journey. In adopting this definition of 'transit' it is acknowledged that migration is non-linear, and therefore that clean divisions between each stage—exit, transit, arrival—are not assumed (Düvell 2012). Moreover, it is acknowledged that the definition used here is state-centric, or based on the primacy of state sovereignty; however, in contrast to state approaches, value judgments that 'transit' migration is 'wrong', 'illegal' or 'irregular' are not found in this analysis.

This article will begin by exploring recent co-operation between the EU and Libya on ‘irregular migration’. Second, a securitization, refugee protection and transit framework is established before identifying the three border sites that figured most in the stories of refugee women interviewed in Malta. The article is concerned with the reach of security arrangements beyond the physical EU border, radiating south from the Central Mediterranean and into North Africa. It will explore the relationship between the sites of women’s experiences of violence *en route* to the EU, and the efforts of the EU to secure its external borders to exclude illegalized travellers by a policy officially labelled ‘externalization’. Women’s stories provide a lived account of securitization and elucidate the gendered ways in which functional border sites (Weber 2006) operate beyond the EU, enlisting state and non-state actors in producing direct and structural violence.

### **Protecting the EU from its Refugee Convention Obligations: the EU and South–North Migration**

The past decade has seen EU migration policy implementation increasingly centred on South–North migratory routes with the aim of preventing and deterring the arrival of illegalized travellers, popularly termed ‘illegal migrants’. While southern Europe was previously thought of as the Achilles heel of EU border control (Watts 2002), the focus of EU institutions and individual Member States has shifted considerably to North African states including Libya, Tunisia and Morocco (Betts 2006; Collyer 2010; Gil-Bazo 2006; Hamood 2008). Previously, countries on the EU migration route had been threatened with reduced foreign aid if they did not co-operate with the EU on efforts to stop irregular migration (Reynolds 2003). At the Seville negotiations in 2002, the UK sought support for this initiative under the pretext of ‘positive conditionality’. Ultimately, these third countries were instead absorbed within the EU security programme, part of movements to create a new ‘circle of friends’ as the EU enlarged (Hayes 2004).

EU engagement with Libya increased as the number of boats leaving Libyan shores, carrying illegalized travellers bound for the EU, rose rapidly from the beginning of this century. Libya had been a pariah in the international community until UN sanctions were lifted in 2003 (Hamood 2008). Previous *ad hoc* arrangements have developed into significant bilateral and multilateral agreements on ‘illegal migration’. Chief among these has been the ‘Treaty of Friendship’ between Italy and Libya that intensified Italy’s role in border security in North Africa, including patrolling the Libyan coastline with ‘mixed crews’ (Ronzitti 2009: 130). In addition, arrangements have been formalized to police land borders in Libya by satellite, entailing a detection system financed jointly by Italy and the EU that effectively pushes the patrol of the EU’s borders further back into Africa. Enhanced border security cooperation between Mediterranean EU Member States and Libya is credited for the sharp drop in the numbers of people arriving in Malta and

the Italian islands of Sicily and Lampedusa throughout 2010. To illustrate, the number of people who arrived by boat in Malta dropped from 1,508 to 47 between 2009 and 2010 (NSO 2011). These arrangements have had significant human rights implications to which we later return.

To prevent illegalized travellers from arriving in the EU and applying for asylum, in late 2010 the EU and Libya signed a bilateral framework agreement to provide financial support to Libya for cooperation on irregular migration. During negotiations for this agreement, the Libyan leader had asked for €5 billion to combat 'illegal migration' (*Times of Malta* 2010); eventually an amount of €60 million was agreed. The agreement contained several issues for further negotiation including: awareness-raising campaigns around the dangers of irregular migration; cooperation to target smuggling networks; strengthening the relationship between Libya and its transit countries; a 'gap-analysis' on existing Libyan border controls; an integrated surveillance system on land borders; and cooperation on return and readmission (EC 2010). Negotiations were suspended in February 2011 when the conflict in Libya erupted (ENPI 2011). A recent Council of the EU report (2012) reiterates its 'readiness' to provide assistance to the National Transitional Council (NTC) in Libya on 'security and border management'. Italy has already concluded its own bilateral agreement with the NTC, which reflects the same terms as that brokered with Gaddafi (Giuffré 2012).

### **Women, Securitization and Transit**

The securitization of migration has come to dominate asylum and migration policy, creating a 'hierarchy of mobility' (Bauman 1998). Although statistics on the number of women migrating outside legal frameworks are difficult to isolate, it is suggested that their numbers are increasing (Bhabha 2004: 235). Academic research is making a significant contribution in analysing how gender shapes access to refugee protection in developed countries (Bhabha 2004; Pickering 2011; Spijkerboer 2000), and the protracted processes around gaining refugee protection. To date, however, studies of gender, transit and refugee protection have focused heavily on the refugee camp experience (Beswick 2001; Khawaja *et al.* 2008; Turner 1999). This research has detailed shifts in gender roles amongst families (Szczepanikova 2005), the prevalence of domestic violence and women's susceptibility to violence in certain camp contexts (Crisp 2000; HRW 2009a).

There is a growing illumination of issues of gender and transit migration outside the refugee camp (AI 2010; Dolma *et al.* 2006; Hamood 2006; HRW 2009b; JRS 2009). Using secondary sources, our previous research examined how women experience opportunistic and systematic gender-based violence in crossing borders from Somalia (Pickering and Gerard 2011). A cross sectional household survey of both men and women by Nagai *et al.* (2008) observed that refugees of both sexes experienced a heightened level of violence in transit. This research was conducted with Sudanese refugees and Ugandan

nationals in a district of Uganda, and Sudanese non-refugees in Sudan. Their study found that sexual violence was most common during routine trips across the border rather than flights for personal safety. Women faced increased risk of sexual violence compared to men, and the mode of travel influenced exposure to sexual violence:

Travelling by truck posed significantly less risk of sexual violence for women, compared with walking (OR 0.48). Associated with sexual attacks was the theft of personal property, or being threatened or otherwise physically attacked, during migration. The risk was much higher for women than men. Age at the migration, marital status, days of preparation for the travel (a measure of suddenness of departure), and days of travel, were not associated with the experience of being sexually abused or raped (Nagai *et al.* 2008: 260).

This research by Nagai *et al.* shows how transport by truck can reduce exposure to violence for women, and that the regularity of border crossing may amplify susceptibility to violence. Examining the contexts in which violence occurs has the potential for reducing the risk of violence, as this article will explore.

This study is concerned with the operation of border security around the edges of the EU. However, it seeks to examine its impact by being attentive to voices often overlooked, those of women. In this research, we are interested in women's accounts not just in the physical spaces of the external border of the EU, but in those border sites that seemingly radiate back from Europe and further into Africa—effectively impacting women from when they exit their homeland. In so doing this examination considers first the impact of opportunistic and organized violence which women experience as they journey north through Africa, violence often perpetrated by a mix of state and non-state agents. It is also interested in their experiences of state violence in Libya and then in the impact of bilateral and multilateral arrangements to interdict and deter illegalized travellers as they cross the Mediterranean. While there is a rich tradition of human rights groups highlighting the violence of these journeys (AI 2010; HRW 2009a, 2009c; JRS 2009), there is relatively little academic empirical research that has sought out the voices of those negotiating these borderlands. There has been even less specifically concerned with some of the gendered dimensions of the experience of transit through Africa.

## **Method**

This study employs a qualitative, feminist methodology to elucidate women's lived reality of seeking asylum; how they made sense of the journey and negotiated the impact of securitization (Denzin and Lincoln 2003; Holland and Ramazanoglu 2002). Qualitative methods offered greater scope to foster a narrative and contextual understanding of women's experiences, particularly where participants' first language was not English (Riessman 1993;

Silverman 2000). The feminist method adopted sought to blend standpoint, empiricist and post-modern approaches (Madriz 2003). Employing a feminist-based interviewing method meant avoiding formal interview techniques and instead embracing what became 'documented conversations' with refugee women, often over the course of many interactions (Gerard forthcoming). This provided room for participants to ask questions about our knowledge of migration pathways in Malta and Australia, the authors' country of residence (May 2001; Oakley 1990). The approach described here consciously circumvents the cool, objective scientific methods of quantitative research (Rodgers 2004). Openness, engagement and building a relationship was important (Rice 1990), as was managing expectations of what involvement in this research would deliver. Moreover, we have sought to avoid portrayals of women from the Global South as in need of rescue from permanent victimization (Mohanty *et al.* 1991), by highlighting women's agency and resistance, and the contexts of induced vulnerability to which EU policy indirectly contributes. The research objective is not to universalize or generalize the accounts presented here as reflective of all refugee women's experiences (Rice 1990). Rather, this is a focused qualitative study that stands to contribute to understandings of securitization and refugee protection, and of their gendered impact, operating at both the micro and macro levels. Finally, in documenting and analysing the experiences of refugee women in this study, we seek to acknowledge intersections of race, class, disability, age and other structural determinants that are key to understanding women's experiences in context (Hyndman 2004). Relational and comparative aspects of a gendered analysis are not pursued here, beyond the extent to which they were discussed by refugee women. This is an area requiring further research.

Basing ourselves in Malta, we interviewed 26 Somali refugee women in periodic visits to Malta between 2009 and 2011, as well as two members of law enforcement agencies and two employees of non-government organizations. This research was conducted prior to the wave of demonstrations known as the Arab Spring that took place in early 2011. As conflict erupted in Libya, Malta assumed a prominent role evacuating citizens from select countries such as the US, UK, Canada and Brazil (BBC 2011). In sharp contrast, many illegalized travellers remained stranded, many of whom were asylum seekers. Reports during the uprising suggested that some illegalized travellers were being confused with outside mercenaries and subsequently abused or even killed (*Times of Malta* 2011). The experiences of transit collected here will not take into account this 2011 conflict, but will reflect other conflicts impacting the region.

We met participants in several ways: signage at venues frequented by transnational migrants (n=3); introductions from NGO workers (n=2); and introductions from other transnational migrants (n=21). Interviews were conducted one-on-one and in English, an obvious limitation of this research design. Participants elected to meet either at their place of accommodation (n=19), workplace (n=4) or other public venue (n=3). Refugee women

respondents were provided with €20 for costs associated with participating in this research. All participants are given pseudonyms in this article.

Somali refugee women were the selected population group as Somalia is widely recognized as a country challenged by a multifaceted humanitarian crisis (ICG 2008; UNIE 2010). Since the beginning of this decade, Malta has seen a dramatic increase in the number of boats carrying people seeking asylum arriving on its shores or within its territorial waters, most departing from Libya (Hammarberg 2011). In 2009 and 2011, Malta received the highest number of asylum seekers in Europe per head of population (Bitoulas 2012; Eurostat 2010). Malta has one of the highest rates of acceptance of asylum applications in the EU and globally (Hammarberg 2011); an indication that the majority of those who arrive by boat are indeed fleeing persecution. The overwhelming number of asylum seekers who arrive by boat are Sub-Saharan African, with Somali nationals comprising the largest majority (Eurostat 2010; NSO 2012). Women constitute an increasing minority of asylum seekers (Gerard forthcoming). The latest figures suggest that in the first six months of 2013, Malta had received around 600 illegalized travellers (UNHCR 2013).

### **Exposure to Violence in Transiting North Africa**

On the journey here there are a lot of people suffering and people dying. People are running away to safety. The journey is very dangerous. You have a 50/50 chance of losing your life. (Miriam)

All participants interviewed journeyed from Somalia to Malta via Ethiopia, Sudan, Libya and then across the Mediterranean. All transited through the same countries, known for their history of sustained conflict, famine, and political instability, in some cases spanning decades (de Waal 1997). None of the women interviewed spoke of obtaining refugee protection in any of the transit countries, even though all but Libya are signatories to the 1951 Refugee Convention.

The women interviewed spoke about transit in two main ways. First, they talked of the variability of transit: exposure to violence, conditions of accommodation, incarceration, how long the journey took and how safe it was were all dependent on numerous factors: primarily, access to financial resources, but also, gender. Second, the women spoke about the danger and violence they had to negotiate at particular transitory junctures throughout the journey. The three sites specifically highlighted by participants—transit through the desert, through Libya and travel by sea to Malta—provide insights as to the impact of securitization on women's experiences of transit and how women negotiated that impact.

To enhance the visibility of women's experiences of violence and the steps required to reduce it, we characterized women's experiences of transit according to Galtung's (1969, 1990) framework of violence. This framework affords

three characterizations of violence: direct, structural and cultural. Direct violence is personal violence or the somatic realization of violence and can include physical and psychological violence (Galtung 1969). Structural violence includes violence resulting from systemic and structural inequalities that affect people's daily lives, such as racism, sexism and poverty (Anglin 1998). Galtung first distinguished between personal and structural violence in 1969, and in 1990 came to add 'cultural violence' to his typology of violence (Galtung 1990). Cultural violence constitutes a legitimizing force for direct and structural violence. For Galtung (1996: 2), 'the major causal direction for violence is from cultural via structural to direct violence'. Criminologists have used notions of structural violence to account for the deaths at the border of significant numbers of undocumented migrants (Weber and Pickering 2011). This article adopts Galtung's conceptualizations of direct and structural violence to consider the impact of border securitization in the context of refugee protection for women's experiences of transit from Somalia to Malta. We identify and examine direct and structural violence in relation to: sexual violence, extortion and abduction; living in the shadows in Libya; and during the boat crossing to Malta.

*'It Depends': Key Variables Influencing Women's Experiences of Transit to Malta*

All of the women participants talked about the dangers inherent in the journey from Somalia to Malta but also its variability. Blota was 22 years old and had been in Malta for 18 months. She described the journey as highly unpredictable. When asked how long it takes to reach Malta she responded that:

It depends; sometimes it takes two weeks, sometimes two months, and sometimes three years. Some stay in prison, some even die in the Sahara. Some are shot. Some people die trying to escape. Sometimes in Malta people are in detention for two years, some for one year, and others for one month, it depends. (Blota)

The kaleidoscope of violence in transit, to which some illegalized travellers are exposed, shapes the journey and produces highly variable experiences of transit from Somalia to Malta. Harm experienced can be located on a spectrum which at one end results in death, as described by Miriam in her extract at the top of this section. Deaths at border crossings are rising to 'unprecedented levels' (Weber and Pickering 2011: 9) and the drivers of such violence deserve consideration. Scholars write of the phenomenon of 'deviancy amplification' (Weber and Grewcock 2011) created by the illegalization of border crossing, or rather 'selectively illegalizing'—creating people-smuggling markets, and heightening the physical risks of clandestine crossing that serve to expose increasing numbers of illegalized travellers to harm (Nevins 2008).

This violence makes the journey unpredictable. We turn now to the first site highlighted by participants.

*Site One: Exposure to Violence Crossing the Sahara Desert—Sexual Violence, Extortion and Abduction*

Eleven women in this study described their experiences of direct violence in the context of the desert crossing between Somalia and Libya. Hamood's (2008: 31) research mainly drew upon experiences of starvation, thirst and fatalities, overcrowding, and rationing of food and water over a long journey. In our conversations with women, experiences of violence and extortion were most prominent. In the excerpt below, Sena describes the Sahara crossing:

On the journey from Somalia, it's very difficult for women. They have to get across the desert and there are men there, like soldiers but not. They have cars for the women and the men to get into to go across the desert but they will stop the car and rape the women over the course of the journey, which lasts about seven days. Then new groups of women arrive and they are replaced. If men object then they will be killed. If they pay then they can protect their wives. In this way it is more difficult for women because they take them. It's not the same for men. (Sena)

Sena's experience of the desert crossing demonstrates the gendered and relational aspects of violence in transit. For some women, sexual violence is a feature of travel through the Sahara. Male partners of women are threatened with harm if they object or attempt to intervene. Sena's experience indicates the kinds of power relationships that dominate during this part of the journey: those perpetrating the violence also facilitate transport and navigation, the price of passage may be rape. Single women and women with partners may both be subject to sexual violence. Women and men face different kinds of violence. According to Sena, if men protest at the violence being carried out on women, they will be killed. Sena makes sense of this violence in characterizing it as part of the journey away from Somalia. She also spoke about being relieved that her husband was able to fly directly from Ethiopia to China, and avoid the overland journey to the EU.

Sena's account provides an impression of the perpetrators of the violence. They seem unaccountable to any authority for their actions. Sena claims that they look like official soldiers, but are not. We might presume from this comment that they are not government soldiers, but perhaps private militia who appear to operate with impunity. In Sena's narrative, the level of organization around the border crossing appears high, testimony to the considerable market in mobility, in opposition to EU transit policy favouring containment. She implies that there is a degree of regularity to this kind of violence exercised throughout the Sahara Desert crossing: for example, the car will be sent back and another group taken. This correlates with research on the regularity of border crossing as heightening exposure to violence

(Nagai *et al.* 2008). What Sena's experience also reveals is that exposure to violence can be mediated by money, an intersection of class and gender.

Extortion was identified by women as a feature of border crossing through the desert. Thus, the desert crossing is made possible by meeting the demands of those who would otherwise prevent their passage. It was understood by one NGO participant that women could provide sexual services or cash to secure a successful border crossing:

In the desert they are stopped and they have to wire money through and that is how they guarantee passage. Those without money will provide sexual services. They give cash or sexual favours. (NGO 1)

The desert crossing is depicted as one in which people are detained and prevented from continuing the journey unless they meet what seem to be specific and organized demands for money or sexual services. If women lack adequate access to finances, their bodies may become a currency. This highlights the significant industry that facilitates the mobility needs of illegalized travellers (Salt and Stein 1997). Notably, the quote above paints a different image to that presented in Sena's narrative: her experience refers to rape, whereas the NGO participant talks about 'sexual favours', distinguishing such favours from rape but suggesting some kind of informed exchange of services. Both highlight the gendered nature of violence and extortion that occurs during the crossing of the desert. The border agents facilitating mobility across the desert expose male and female illegalized travellers to violence through differing means.

#### *Site Two: 'Life in the Shadows' in Libya*

Life is really in the shadows in Libya because they will put you in detention. So you have to really hide. (Pia)

After traversing the Sahara, most of the women interviewed entered Libya. Participants travelled through Libya prior to the revolution that ended Gaddafi's rule. Libya at that time was viewed by participants as a place of intermediate or extended stay where migrants gathered resources to fund the final leg of their journey on to Europe. In a previous issue of this journal, Hamood's (2008) research demonstrated how the EU's claims to have adopted an integrated approach to migration management in Libya within a framework of human rights, have failed to materialize. This conclusion was vividly reflected in our conversations with refugee women. In our research, the conditions in Libya were described by women in terms that emphasized both their vulnerability and their agency in seeking to avoid detention. For Pia, the threat of detention was so great that it impacted on her daily negotiation of life in Libya. Illegalized travellers' avoidance of detection by minimizing their use of public space has been highlighted by McDowell and Wonders (2009) in the context of the US–Mexico border. Speaking with

women migrants residing in two large cities in Arizona, led McDowell and Wonders to observe how technologies of control over those with unlawful status shape migrants' use of public space. Similarly, as described by Pia, while in Libya the participants in this study made strategic decisions about how they would negotiate public life and sought to avoid the use of public spaces.

Residing in Libya for days, months or even years necessitated a strategic approach to accommodation. One participant described the accommodation in Libya as akin to a prison. Aziza was corralled into accommodation with other illegalized travellers, where her movements were controlled by those facilitating her onward migration. She had to negotiate to leave each day:

The living situation is difficult because you are not free. There are people standing over you and you have to negotiate to leave. Some people pay money to leave, others provide sex or are raped. (Aziza)

This description evidences the precarious existence of illegalized travellers: unable to live freely and subject to the controls of agents whose identity is unclear. Despite this, Aziza sourced and maintained employment as a domestic helper. Once in public space, Aziza said avoiding interaction with police was paramount in order to stay out of detention.

While around two-thirds of participants described their fear of detention and how it influenced their decisions to avoid public spaces, only two women spoke about their direct experience of detention in Libya. In both cases, the two participants were arrested while in the process of boarding a boat that was heading for the southern Member States of the EU:

I was in Libya for one year and two months. I was arrested one time and spent one month in detention. I was arrested trying to get onto a big boat to go to Europe. There were 160 on board and 30 were arrested. I was arrested because I was in the car waiting to get on the boat. The boat eventually left and made it to Italy and the people made it to Italy. (Sena)

I was held in detention for nine months after being arrested. I was about to catch a big boat. I think because it was a big boat the police heard us. Detention in Malta is not as bad as Libya, you don't get beaten in Malta. (Syrad)

The detention centres in Libya were partly funded by the Italian Government (Brothers 2007), illustrating the functional mobility of the EU border (Weber 2006). Since the Revolution, Italy has restored bilateral cooperation with Libya on irregular migration and border control, although the terms of the agreements reached remain unclear. Reportedly, cooperation in several areas has been agreed, including the construction of health facilities for a detention centre (Statewatch 2012). Conditions in the Libyan detention centres have been criticized by many human rights groups as overcrowded, unhygienic and violent (AI 2010; HRW 2009c; JRS 2009). No healthcare is provided, there is minimal access to food and water, and ailments such as scabies, dermatitis and

respiratory problems are endemic (JRS 2009). Hamood's (2006) study addressed the gendered nature of violence in Libya's detention centres, observing that female participants had been threatened with rape and both male and female detainees subjected to beatings. Syrad's narrative above suggests she was physically abused in a Libyan detention centre. Research by Amnesty International (2010) similarly found evidence of violence against women in detention.

Women's experiences show that detention implicitly served to stop and punish those seeking to get to the EU by boat. The amount of time spent in detention varied for each participant. Syrad described detention in Malta as comparatively better than Libya, specifically because there was no physical abuse in the former. However, she did not elaborate on what she had experienced in Libya. Neither of the participants detained in Libya talked about rape in the detention centres, and we did not expect that participants would reveal this information. On this point, however, NGO participants who had worked in a medical capacity with migrant women in Malta testified that women had reported rape in Libyan detention centres:

Detention centres in Libya warehouse people who are illegal. The people are exploited and treated poorly and there is rape and protection sex and imprisonment. (NGO 1)

Levels of poverty coupled with the low wages in Libya made the detention system susceptible to corruption (NGO 1). Corruption is a form of structural violence, with guards accepting bribes to supplement their poor pay and conditions. Border control policies thus create the conditions that encourage guards to accept money to release illegalized travellers, but also to use migrants as a commodity, sometimes releasing them and arresting them again on the same day to yield more money (JRS 2009: 11). The cycle of violence against illegalized travellers in public life in Libya—arrest, detention, freedom and arrest once more—was understood to be the manifestation of a considerably organized and lucrative industry.

Some of the participants interviewed were able to seek and find work in Libya. Libya has a long history of being both a destination country for workers, and a transit country (see Düvell 2012). Some migrants transit quickly whereas others work to fund their onward journey. Research suggests migrant women adapt more flexibly to formal and informal markets in receiving countries, so are more likely to be the main income earner (Franz 2003; Szczepanikova 2005). Libya was recognized by most participants as a place where women could potentially work in order to save enough money to buy a ticket on a boat to Europe:

I worked in Libya for four months as a housekeeper. I made good money there and was able to pay to come to Europe with my husband. (Ayan)

This view was not universal. Several participants offered alternative accounts of employment in Libya. Nina transited Libya quickly, and was alarmed by

what she experienced there, saying ‘there is no work. There are a lot of people suffering and people dying’ (Nina).

The stories of those who did work in Libya revealed how work opportunities were gendered. Women mainly worked as cleaners in domestic settings, a hallmark of gendered global inequalities (Rodríguez 2007). Strobl (2009) in her examination of ‘housemaids’ in Bahrain, writes that in many countries around the globe, domestic workers have become increasingly vulnerable to abuse including that of a physical and sexual nature. One NGO participant in this research observed that some women pay for their journey across borders through the financial gains from sex work, either actively choosing this work or coerced by the circumstances. Despite studies suggesting women are more able to adapt flexibly in informal economies, there remain a limited number of options for work available to women, which can result in them being drawn into the informal economy of sex work in order to fund their migration to the EU. Participants in Hamood’s (2008) research stated that failure to pay illegalized travellers for work undertaken was a common problem in Libya. The women we interviewed did not directly discuss experiences of abuse, although some did discuss whether securing pay for their work was easier than it was for male illegalized travellers. Two participants described how men were not always paid for their work, while women had a better chance of being paid by their employers. Women’s accounts of employment in Libya illustrate several gendered dimensions in gaining access to financial resources to secure a successful border crossing to the EU, one of the most dangerous parts of the journey.

### *Site Three: The Boat Journey to Malta*

There were lots of people on my boat to Malta. I couldn’t sleep on the boat. We were on the boat for three days and two nights. When we were rescued it was fantastic! We all thought we were going to die. I have lost many friends at sea. Twice my boat was turned back before I successfully arrived in Malta. We all didn’t know where we were going on the boat. We had a driver who was very smart. He stopped the boat so we could wait out a storm. When it was clear we kept going. There is no choice when you are to get on the boat; you have to go when they tell you. (Amina)

All of the women participants in this research had survived the journey by sea from Libya to Malta. There is no clear reporting or accounting system for the number of boats that go missing in the Mediterranean, a trend reflected in many securitized border zones across the globe (Weber and Pickering 2011). Although migrant deaths at sea are not systematically recorded, it is estimated that around 10,000 migrants have perished in the Mediterranean and Atlantic Oceans over the past two decades (Weber and Pickering 2011: 99). Whilst fewer fled to the EU than to other neighbouring North African countries, the Arab Spring saw around 58,000 illegalized travellers arrive in the EU via the Mediterranean in 2011. The Mediterranean was declared the

most dangerous stretch of water in the world for refugees and migrants in 2011 with over 1,500 people recorded as drowned or missing trying to reach the EU (UNHCR 2012). Given the huge number of deaths and the high incidence of border crossings by sea, there is arguably an increased obligation on EU Member States to ensure the safety of people who adopt this method of travel (Carling 2007; Hamood 2008; Weber and Pickering 2011).

Travelling to Malta by sea from Northern Africa can take many days (HRW 2012). The law enforcement participants in this research confirmed that most of the boats arrived between April/May and September/October each year, as this was the period during which the seas were calmest. Despite this, the journey was described by most refugee women in terms that evoked a sense of danger and fear:

My boat had about 80 people and 12 women. The boat took four days. I was crying, just the whole time by myself. It was bad. (Blota)

On the other hand, five participants said they had access to life jackets and that the journey to Malta was relatively quick:

We came on a boat in 2008 to Malta. There were 40 to 50 people on board. There were six children and four women. There were 40 men. It was safe and we had life jackets. We were on the boat for two days. I came with my husband and eight-year-old child. (Dekha)

This research suggests that like other parts of the transit, the conditions of boat travel are determined by the amount of material and social resources to which women had access. This was influenced by membership of a travelling family group, by networks of family and kin and financial resources. For Dekha, the conditions on her boat were good enough to be described as 'safe'. However, even with safety supports such as life jackets, the journey could still be overcrowded and harrowing. As Ayan describes:

I came on the boat pregnant. I came with 80 people. We had those reflector jackets. You are just sitting with your elbows pressed against other people. There is water lapping up at you. (Ayan)

The boat journey from Libya to Malta covers a great expanse of sea navigated with rudimentary gear, according to the law enforcement participants interviewed in this study. Two participants completed the journey heavily pregnant and described it as extremely uncomfortable. Dehydration is a particular danger for pregnant women, as other researchers have found in the context of crossings of the US–Mexico border (Falcon 2001). This was also confirmed by a law enforcement officer interviewed for this research:

The most terrible memory I have is of two women arriving dead on the boat and both were pregnant. The autopsies said they dehydrated. (LE 1)

One NGO participant felt that women are at the bottom of the social hierarchy on these journeys: given the most precarious position on the boat and at times subject to burns by being too close to the engine (NGO 1). The boat trip to Malta is invariably overcrowded, offering limited access to safety supports and exposing illegalized travellers to gendered harms.

Structurally, bilateral agreements struck between Member States and North African countries have been implemented to avoid obligations owed to illegalized travellers at sea. This has had the greatest impact through practices of interdiction, involving the return of boats containing asylum seekers to Libya, after they have reached international and sometimes Italian or Maltese waters (Betts 2010). This was the case with the previous ‘Treaty of Friendship’ between Italy and Libya, which allowed for boats to be returned to Libya without those on board accessing refugee determination procedures. As of November 2009, 1,409 people had been forcibly returned to Libya and detained, without having their asylum applications adjudicated (JRS 2009). This bilateral arrangement proved vastly more effective in stopping irregular migration than the Frontex patrols that had taken place each year between 2006–2009. Frontex patrols in this region stopped in 2010 as Malta declined to participate, citing concerns over a condition that mandated Member States to receive intercepted boats (Camilleri 2011). This condition was later annulled (Camilleri 2012). Italy’s interdiction practices were recently struck down by the European Court of Human Rights in the case of *Hirsi v Italy*.<sup>1</sup> The Court decided in a unanimous verdict that Italy’s conduct had breached numerous articles of the European Convention on Human Rights. It should be a source of concern to human rights activists that the court took from mid 2009 to early 2012 to decide the case, during which time uncertainty about the legitimacy of the practice prevailed.

Notwithstanding the International Convention for the Safety of Life at Sea, which imposes a ‘duty to render assistance’ to boats in distress (see Goodwin-Gill 1996: 157), the practice of EU Member States to contest responsibility for rescue operations has arguably exacerbated distress, principally by delaying the provision of medical care to those on board (UNHCR 2011). While the women interviewed in this research did not talk about any direct experiences of interdiction, they did discuss interacting with other vessels at sea. Two of the refugee women spoke of being ‘in trouble’ on their boat, including mechanical and navigational failings, the impact of overcrowding on the operation of the vessel, and of interception by another vessel. One participant described interacting with people on another boat, receiving minimal assistance:

We set off at 4 am and it took two days. On the second day the sea was very rough. We were sitting with our knees up to our heads and the water was directly behind me. We were so scared. A big boat came past on the second day and we asked them for petrol. We only had 40L and we were begging them ‘please, please’ for petrol. The boat said no. They said we are only three hours

from Malta. But it was the day and we couldn't see Malta. At night you can see for the lights. But we couldn't see so we decided to stop and continue at night. Then we arrived in Malta. (Katna)

Women's experiences of the reluctance of some vessels to get involved upon coming across a boat in distress with illegalized travellers on board was in many ways emblematic of their exposure to harm during transit to the EU. The Council of Europe has recently called NATO countries to account for failing to come to the aid of a boat carrying 72 illegalized travellers during the recent Libyan conflict (Davis 2012). NATO's blockade of the waters between Italy and Libya ensured they were being closely monitored, yet no country came to the aid of the vessel after repeated distress calls by Italian maritime authorities. After 15 days at sea, their boat eventually drifted back to Libya with only 11 people alive. Two others later died ashore. These incidents demonstrate the reluctance of key players to save the lives of illegalized travellers at risk at sea. Transit is a period of significant environmental, social, sexual and legal risk for women who participated in this study, where there are not clear demarcations for state and non state actors to be considered accountable or engaged for either the direct or structural violence Galtung explained.

## **Conclusion**

The experience of transit is a period of direct and structural violence for refugee women journeying from Malta to Somalia. The violence occurs in a range of sites. Considering transit as a period of direct and structural violence seeks to make often hidden or unspoken violence more visible to EU policy makers. Direct violence shapes women's experiences of transit through exposure to sexual violence, exploitation, extortion and even death. Despite evidence of agency in some contexts, structural violence is clearly relatable to the broader conditions in which individual and collective violence is experienced. Women's experiences of transit en route to Malta reveal the inaccessibility of refugee protection in the regions neighbouring Somalia. The failure to protect produces conditions that generate and sustain violence throughout the transit period. Moreover, border securitization that is based on the broad exclusion of undesirable migrants compounds and extends the direct violence. That racialized and gendered groups of illegalized travellers are drawn into making long, dangerous and expensive journeys to the EU is illustrative of the structural violence of blanket border securitization, especially for those from North Africa. The securitization of migration contributes to the conditions in which mobility comes at a higher price, literally and metaphorically. The ability to withstand and/or negotiate direct and structural violence in transit is a major determinant of who is able to successfully transit to the EU.

Whilst much has changed in North Africa and particularly Libya since this research was conducted, this transit region remains strategically important to

both the EU and those in need of refugee protection. Recent statistics reveal that irregular migration to the EU via the Central Mediterranean has not returned to its 2011 peak, although more were using this route in 2012 than in 2009 and 2010 (Frontex 2013). The number of Tunisian nationals arriving in the EU fell in the aftermath of an agreement negotiated between Italy and Tunisia on return (Frontex 2012). An increasing number of Sub-Saharan African nationals are travelling through the Central Mediterranean, with Eritreans comprising the largest nationality and overtaking Somalis (Frontex 2013). Many have their asylum claims accepted; 90 per cent of those that applied for asylum in Malta in 2012 successfully gained some form of humanitarian protection (NSO 2013). Reportedly, Sub-Saharan Africans continue to be vulnerable to 'extreme violence' in Libya (Frontex 2013: 23; see also HRW 2012). Libya is again the subject of intense EU securitization efforts. Frontex (2013) reports that a lack of professional and technical expertise amongst law enforcement agencies within Libya make migration management cooperation with the country an urgent and core priority for the EU. EUROSUR, the European Border Surveillance System, is not yet operational but is intended to create a technical framework for external border surveillance in the Southern Mediterranean and eastern EU borders, and lead to greater information sharing between Member States (AAS 2011). Some argue it was developed to prevent irregular migration from North Africa to the EU in the aftermath of events such as the Arab Spring (Hayes and Vermeulen 2012). The architects of EUROSUR also claim it will reduce loss of life at sea (EC 2013). Its impact on refugee protection will have to be closely monitored.

Interviews with women who have travelled through North Africa and successfully sought refugee protection in Malta, illustrate the fact that the risks involved in irregular border crossing have gendered dimensions. Pregnant women are more prone to dehydration and women were more likely to be placed at the most vulnerable position on the boat to the EU. Refugee women, NGO and law enforcement participants all experienced and/or observed women experiencing specifically gendered experiences crossing borders into Europe. Sexual violence or the provision of sexual services was often the border toll paid by many women to negotiate their crossing. NGO participants understood that some women were sometimes agentive in using sexual services to pay for their journey. It was their view that women were drawn into sex work as part of an exchange for assistance in crossing borders. This has significant consequences for women when they arrive in the EU, such as pregnancy or other health issues, as our previous research has highlighted (Gerard and Pickering 2012).

Current EU policy embodies clear structural contradictions that bear a disturbing relationship with the violence experienced by refugee women in transit. On the one hand, refugee protection obligations exist at law and women's experiences in securing some form of refugee protection are testimony to that lived reality, however partial and compromised (see Gerard and

Pickering 2012). On the other hand, the EU and individual Member States are doing all that they can to securitize the border and stop illegalized travellers from arriving in the EU and applying for asylum. Transit is an important part of the picture for EU politicians and policy makers who have worked to craft a latticework of functional border sites to prevent illegalized travellers from reaching the EU. The securitization of migration may put in place bilateral agreements and other arrangements to deter illegalized travellers but ultimately they divert people into riskier methods of travel (Weber and Pickering 2011), symbiotically reinforcing each other in the borderlands surrounding the Global North (Michalowski 2007; Pickering 2011). Constraints on the mobility of illegalized travellers drive an economy for guards, private militia, and other actors in North Africa.

The recent trend that sees an increase in funding to refugee protection programmes in North Africa, may lead to more Member States designating Libya a 'safe third country' to facilitate readmission agreements that enable deportation of asylum seekers from the EU to Libya. The cycle of violence analysed here will continue until sound policy based on human rights breaks the impasse. Such policy may contain increased regular legal pathways of migration, an increase in resettlement quotas and secure protections to refugees upon arrival in the EU. There is a strong relationship between the sites of women's experiences of violence and the efforts of the EU to secure its external borders to exclude illegalized travellers. Securitization heightens exposure to harm for illegalized travellers and aligns poorly with the humanitarian emphasis of the international legal refugee protection framework.

### Acknowledgements

Research partly supported by the Australian Research Council FT100100548 Border Policing: Security, Human Rights and Gender. We would like to thank the two anonymous reviewers for their constructive comments on this manuscript.

1. *Case of Hirsi Jamaa and Others v Italy* (Application no. 27765/09) 23 February 2012, Grand Chamber European Court of Human Rights.

**AAS, K.** (2011) "'Crimmigrant' Bodies and Bona Fide Travellers: Surveillance, Citizenship and Global Governance'. *Theoretical Criminology* 15: 331.

**AI** (2010) *Seeking Safety, Finding Fear: Refugees, Asylum-seekers and Migrants in Libya and Malta*. London: Amnesty International.

**ANGLIN, M.** (1998) 'Feminist Perspectives on Structural Violence'. *Identities* 5(2): 145–151.

**BAUMAN, Z.** (1998) *Globalization: The Human Consequences*. New York: Columbia University Press.

**BBC** (2011) 'Libya Protests: Evacuation of Foreigners Continues'. *BBC News Middle East*. London, BBC World Service, Available at <<http://www.bbc.co.uk/news/world-middle-east-12552374>> (accessed 2 March 2011).

- BESWICK, S.** (2001) ‘“If You Leave Your Country You Will Have No Life!” Rape, Suicide, and Violence: The Voices of Ethiopian, Somali, and Sudanese Female Refugees in Kenyan Refugee Camps’. *Northeast African Studies* **8**(3): 69–98.
- BETTS, A.** (2006) ‘Towards a Mediterranean Solution? Implications for the Region of Origin’. *International Journal of Refugee Law* **18**(3/4): 652–676.
- BETTS, A.** (2010) ‘Towards a “Soft Law” Framework for the Protection of Vulnerable Irregular Migrants’. *International Journal of Refugee Law* **22**(2): 209–236.
- BHABHA, J.** (2004) ‘Demography and Rights: Women, Children and Access to Asylum’. *International Journal of Refugee Law* **16**(2): 227–243.
- BIGO, D.** (2001) ‘Migration and Security’. In Guiraudon, V. and Joppke, C. (eds) *Controlling a New Migration World*. New York: Routledge.
- BITOULAS, A.** (2012) ‘Asylum Applicants and First Instance Decisions on Asylum Applications: Second Quarter 2011’. In EUROSTAT (ed.) *Population and Social Conditions: Statistics in Focus*. European Commission.
- BROTHERS, C.** (2007) ‘Obscurity and Confinement for Migrants in Europe’. *New York Times*, 30 December. Available at <<http://www.nytimes.com/2007/12/30/world/europe/30iht-greece.html?pagewanted=all>> (accessed 22 November 2011).
- CAMILLERI, I.** (2011) ‘No Frontex Mission Planned This Year’. *Times of Malta*. Available at <<http://www.timesofmalta.com/articles/view/20110204/local/no-frontex-mission-planned-this-year.348536>> (accessed 4 February 2011).
- CAMILLERI, I.** (2012) ‘“Anti-Maltese” Frontex Rules are Declared Null’. *Times of Malta*. Available at <<http://www.timesofmalta.com/articles/view/20120907/local/-Anti-Maltese-Frontex-rules-are-declared-null.435923>> (accessed 20 January 2013).
- CARLING, J.** (2007) ‘Migration Control and Migrant Fatalities at the Spanish–African Borders’. *International Migration Review* **41**(2): 316–343.
- COLLYER, M.** (2010) ‘Stranded Migrants and the Fragmented Journey’. *Journal of Refugee Studies* **23**(3): 273–293.
- COUNCIL OF THE EU** (2012) *Council Conclusions on Libya*. Brussels: Council of the European Union.
- CRISP, J.** (2000) ‘A State of Insecurity: The Political Economy of Violence in Kenya’s Refugee Camps’. *African Affairs* **99**: 601–632.
- DAVIS, S.** (2012) ‘Left for Dead in a Crowded Boat, Now They Want Justice’. *Sydney Morning Herald*, 25 August. Available at <<http://www.smh.com.au/world/left-for-dead-in-a-crowded-boat-now-they-want-justice-20120824-24rrf.html>> (accessed 28 September 2012).
- DE WAAL, A.** (1997) *Famine Crimes: Politics and the Disaster Relief Industry in Africa*. London: James Currey.
- DENZIN, N.** and **LINCOLN, Y.** (2003) ‘Methods of Collecting and Analyzing Empirical Materials’. In Denzin, N. and Lincoln, Y. (eds) *Collecting and Interpreting Qualitative Materials*. Thousand Oaks: Sage Publications Inc, pp. 47–60.
- DOLMA, S., SINGH, S., LOHFELD, L., ORBINSKI, J.** and **MILLS, E.** (2006) ‘Dangerous Journey: Documenting the Experience of Tibetan Refugees’. *American Journal of Public Health* **96**(11): 2061–2064.
- DÜVELL, F.** (2012) ‘Transit Migration: A Blurred and Politicised Concept’. *Population, Space and Place* **18**(4): 415–427.
- EC** (2002) ‘Council Directive 2002/90/EC of 28 November 2002 Defining the Facilitation of Unauthorised Entry, Transit and Residence’. CNS 2000/0821.
- EC** (2010) ‘European Commission and Libya agree a Migration Cooperation Agenda during High Level Visit to Boost EU–Libya Relations’. 5 October. Brussels, European Commission, Available at <<http://europa.eu/rapid/pressReleasesAction.do?reference=MEMO/10/472>> (accessed 29 August 2012).
- EC** (2013) ‘Draft Regulation of the European Parliament and of the Council establishing the European Border Surveillance System (EUROSUR)’. 2011/0427(COD), 11367/13.

- ENPI (2011) 'EU Suspends Framework Agreement Talks as Libya Reaches "point of no return"'. Brussels, ENPI Information and Communication Support Project, Available at <[http://www.enpi-info.eu/mainmed.php?id=24232andid\\_type=landlang\\_id=450](http://www.enpi-info.eu/mainmed.php?id=24232andid_type=landlang_id=450)> (accessed 28 August 2012).
- EUROSTAT (2010) 'Around 260,000 Asylum Applicants Registered in 2009'. Eurostat News Release. Brussels, Eurostat, Available at <[http://epp.eurostat.ec.europa.eu/cache/ITY\\_PUBLIC/3-04052010-BP/EN/3-04052010-BP-EN.PDF](http://epp.eurostat.ec.europa.eu/cache/ITY_PUBLIC/3-04052010-BP/EN/3-04052010-BP-EN.PDF)>.
- FALCON, S. (2001) 'Rape as a Weapon of War: Advancing Human Rights for Women at the US–Mexico Border'. *Social Justice* 28(2): 31–50.
- FOUCAULT, M. (1991) 'Governmentality'. In Burchell, G., Gordon, C. and Miller, P. (eds) *The Foucault Effect*. London: Harvester Wheatsheaf, pp. 87–104.
- FRANZ, B. (2003) 'Transplanted or Uprooted? Integration Efforts of Bosnian Refugees Based Upon Gender, Class and Ethnic Differences in New York City and Vienna'. *European Journal of Women's Studies* 10(2): 135–157.
- FRONTEX (2012) 'FRAN Quarterly: Quarter 3 July–September 2011'. In Risk Analysis Unit (ed.) *FRAN Quarterly*. Warsaw, FRONTEX.
- FRONTEX (2013) 'FRAN Quarterly: Quarter 4 October–December 2012'. In Risk Analysis Unit (ed.) *FRAN Quarterly*. Warsaw, FRONTEX.
- GALTUNG, J. (1969) 'Violence, Peace and Peace Research'. *Journal of Peace Research* 6(3): 167–191.
- GALTUNG, J. (1990) 'Cultural Violence'. *Journal of Peace Research* 27(3): 291–305.
- GALTUNG, J. (1996) *Peace by Peaceful Means: Peace and Conflict, Development and Civilisation*. London: Sage.
- GERARD, A. (forthcoming) *The Securitisation of Migration and Refugee Women*. Abingdon: Routledge.
- GERARD, A. and PICKERING, S. (2012) 'The Crime and Punishment of Somali Women's Extra-legal Arrival in Malta'. *British Journal of Criminology* 52(3): 514.
- GIL-BAZO, M. (2006) 'The Practice of Mediterranean States in the Context of the European Union's Justice and Home Affairs External Dimension: The Safe Third Country Concept Revisited'. *International Journal of Refugee Law* 18(3/4): 571–600.
- GIUFFRÉ, M. (2012) 'State Responsibility Beyond Borders: What Legal Basis for Italy's Pushbacks to Libya?' *International Journal of Refugee Law* 24(4): 692–734.
- GOODWIN-GILL, G. (1996) *The Refugee in International Law*. Oxford: University Press.
- HAMMARBERG, T. (2011) *Report by Thomas Hammarberg, Commissioner for Human Rights of the Council of Europe: Following his Visit to Malta from 23 to 25 March 2011*. Strasbourg: Commissioner for Human Rights.
- HAMOOD, S. (2006) *African Transit Migration through Libya to Europe: The Human Cost*. Cairo: The American University in Cairo, Forced Migration and Refugee Studies.
- HAMOOD, S. (2008) 'EU–Libya Cooperation on Migration: A Raw Deal for Refugees and Migrants?' *Journal of Refugee Studies* 21(1): 19–42.
- HAYES, B. (2004) 'Implementing the Amsterdam Treaty: Cementing Fortress Europe'. *Statewatch Bulletin* 14(2).
- HAYES, B. and VERMEULEN, M. (2012) *Borderline: The EU's New Border Surveillance Initiatives. Assessing the costs and fundamental rights implications of EUROSUR and the 'Smart Borders' Proposals*. Berlin: Heinrich Böll Foundation.
- HOLLAND, J. and RAMAZANOGLU, C. (2002) *Feminist Methodology: Challenges and Choices*. London: Sage.
- HRW (2009a) *From Horror to Hopelessness: Kenya's Forgotten Somali Refugee Crisis*. New York: Human Rights Watch.
- HRW (2009b) 'Gaddafi Visit Celebrates Dirty Deal'. New York, Human Rights Watch, Available at <<http://www.hrw.org/en/news/2009/06/09/italylibya-gaddafi-visit-celebrates-dirty-deal>> (accessed 27 January 2011).
- HRW (2009c) *Pushed Back, Pushed Around*. New York: Human Rights Watch.

- HRW (2012) *Boat Ride to Detention*. New York: Human Rights Watch.
- HUYSMANS, J. (2006) *The Politics of Insecurity: Fear, Migration and Asylum in the EU*. London: Routledge.
- HYNDMAN, J. (2004) 'Refugee Camps as Conflict Zones: The Politics of Gender'. In Giles, W. and Hyndman, J. (eds) *Sites of Violence: Gender and Conflict Zones*. Los Angeles: Berkeley, pp. 193–212.
- ICG (2008) *Somalia: To Move beyond the Failed State. Africa Report*. Brussels: International Crisis Group.
- JRS (2009) *Do they Know? Asylum Seekers Testify to Life in Libya*. Valetta: Jesuit Refugee Service.
- KAPUR, R. (2005) 'Travel Plans: Border Crossings and the Rights of Transnational Migrants'. *Harvard Human Rights Journal* 18: 107–138.
- KHAWAJA, N., WHITE, K., SCHWEITZER, R. and GREENSLADE, J. (2008) 'Difficulties and Coping Strategies of Sudanese Refugees: A Qualitative Approach'. *Transcultural Psychiatry* 45(3): 489–512.
- MADRIZ, E. (2003) 'Focus Groups in Feminist Research'. In Denzin, N. and Lincoln, Y. (eds) *Collecting and Interpreting Qualitative Materials*. Thousand Oaks: Sage Publications Inc, pp. 363–388.
- MARTIN, M. (2011) *The Arab Spring and the Death Toll in the Mediterranean: The True Face of Fortress Europe*. London: Statewatch.
- MAY, T. (2001) *Social Research: Issues, Methods and Process*. Philadelphia: Open University Press.
- MCDOWELL, M. and WONDERS, N. (2009) 'Keeping Migrants in their Place: Technologies of Control and Racialized Public Space in Arizona'. *Social Justice* 36(2): 54.
- MICHALOWSKI, R. (2007) 'Border Militarisation and Migrant Suffering: A Case of Transnational Social Injury'. *Social Justice* 34(2): 62–122.
- MOHANTY, C. T., RUSSO, A. and TORRES, L. (1991) *Third World Women and the Politics of Feminism*. Indiana University Press Bloomington and Indianapolis.
- NAGAI, M., KARUNAKARA, U., ROWLEY, E. and BURNHAM, G. (2008) 'Violence against Refugees, Non-refugees and Host Populations in Southern Sudan and Northern Uganda'. *Global Public Health* 3(3): 249–270.
- NEVINS, J. (2008) *Dying to Live: A Story of US Immigration in an Age of Global Apartheid*. San Francisco: City Lights.
- NSO (2011) *World Refugee Day 2011*. Valetta: National Statistics Office.
- NSO (2012) *World Refugee Day 2012*. Valetta: National Statistics Office Malta.
- NSO (2013) *World Refugee Day 2013*. Valetta: National Statistics Office Malta.
- OAKLEY, A. (1990) 'Interviewing Women: A Contradiction in Terms'. In Roberts, H. (ed.) *Doing Feminist Research*. London: Routledge.
- OELGEMÖLLER, C. (2010) '"Transit" and "Suspension": Migration Management or the Metamorphosis of Asylum-Seekers into "Illegal" Immigrants'. *Journal of Ethnic and Migration Studies* 37(3): 407–424.
- PICKERING, S. (2011) *Women, Violence and Borders*. London: Springer.
- PICKERING, S. and GERARD, A. (2011) 'The Journey to the Border: Continuums of Crossing'. In Pickering, D. S. (ed.) *Women, Borders and Violence*. London: Springer, pp. 17–37.
- REYNOLDS, P. (2003) 'Immigration Tops Seville Agenda', 20 June. London, BBC World News Service, Available at <<http://news.bbc.co.uk/2/hi/europe/2055824.stm>> (accessed 28 August 2012).
- RICE, M. (1990) 'Challenging Orthodoxies in Feminist Theory: A Black Feminist Critique'. In Gelthorpe, L. and Morris, A. (eds) *Feminist Perspectives in Criminology*. Buckingham: Open University Press.
- RIESSMAN, C. K. (1993) *Narrative Analysis*. London: Sage Publications.
- RODGERS, G. (2004) '"Hanging out" with Forced Migrants: Methodological and Ethical Challenges'. *Forced Migration Review* 21: 48–49.

- RODRÍGUEZ, E. G.** (2007) 'The "Hidden Side" of the New Economy: On Transnational Migration, Domestic Work, and Unprecedented Intimacy'. *Frontiers: A Journal of Women Studies* 28(3): 60–83.
- RONZITTI, N.** (2009) 'The Treaty on Friendship, Partnership and Cooperation between Italy and Libya: New Prospects for Cooperation in the Mediterranean?' *Bulletin of Italian Politics* 1(1): 125–133.
- SALT, J.** and **STEIN, J.** (1997) 'Migration as a Business: The Case of Trafficking'. *International Migration* 35(4): 467.
- SILVERMAN, D.** (2000) *Doing Qualitative Research: A Practical Handbook*. London: Sage Publications.
- SPIJKERBOER, T.** (2000) *Gender and Refugee Status*. Aldershot: Ashgate.
- STATEWATCH** (2012) 'Italy/Libya: Documents Unveil Post-Gaddafi Cooperation Agreement on Immigration', London, Statewatch, Available at <<http://database.statewatch.org/article.asp?aid=31799>> (accessed 11 September 2013).
- STROBL, S.** (2009) 'Policing Housemaids: The Criminalization of Domestic Workers in Bahrain'. *British Journal of Criminology* 49(2): 165–183.
- SZCZEPANIKOVA, A.** (2005) 'Gender Relations in a Refugee Camp: A Case of Chechens Seeking Asylum in the Czech Republic'. *Journal of Refugee Studies* 18(3): 281–298.
- TIMES OF MALTA** (2010) 'EU-Libya Reach Agreement to Control Migration'. *Times of Malta*, 6 October, accessed 28 July 2012, <<http://www.timesofmalta.com/articles/view/20101006/local/libya-eu-reach-milestone-agreement-to-stem-migration.329998>>.
- TIMES OF MALTA** (2011) 'JRS Appeals for Help to Asylum Seekers Stranded in Libya'. *Times of Malta*, 1 March, accessed 30 May 2011, <<http://www.timesofmalta.com/articles/view/20110301/local/jrs-appeals-for-help-to-asylum-seekers-stranded-in-libya.352619>>.
- TURNER, S.** (1999) *Angry Young Men in Camps: Gender, Age and Class Relations Among Burundian Refugees in Tanzania. New Issues in Refugee Research*. Centre for Documentation and Research.
- UNHCR** (2011) 'UNHCR Calls on States to Uphold Principles of Rescue-at-sea and Burden Sharing', Geneva, UNHCR. Available at <<http://www.unhcr.org/4d9f1f7e6.html>> (accessed 8 April 2011).
- UNHCR** (2012) 'Mediterranean Takes Record as Most Deadly Stretch of Water for Refugees and Migrants in 2011', *Briefing Notes*. Geneva, UNHCR, Available at <<http://www.unhcr.org/4f27e01f9.html>> (accessed 9 September 2013).
- UNHCR** (2013) 'Mediterranean Crossings to Italy and Malta Exceed 8000 in First Six Months of 2013', *Briefing Notes*. Geneva, UNHCR, Available at <<http://www.unhcr.org/51d6a0859.htm>> (accessed 12 September 2013).
- UNIE** (2010) *Report of the Independent Expert on the Situation of Human Rights in Somalia, Shamsul Bari*. New York: United Nations Human Rights Council.
- VAN WALSUM, S.** and **SPIJKERBOER, T.** (2007) *Women and Immigration Law: New Variations on Classical Feminist Themes*. Oxon: Routledge-Cavendish.
- WATTS, J.** (2002) *Immigration Policy and the Challenge of Globalization*. New York: Cornell University Press.
- WEBER, L.** (2006) 'The Shifting Frontiers of Migration Control'. In Pickering, S. and Weber, L. (eds) *Borders, Mobility and Technologies of Control*. Dordrecht: Springer, pp. 21–43.
- WEBER, L.** and **GREWCOCK, M.** (2011) 'Criminalizing People Smuggling: Preventing or Globalizing Harm?' In Allum, F. and Gilmour, S. (eds) *The Routledge Handbook of Transnational Organized Crime*. New York: Routledge.
- WEBER, L.** and **PICKERING, S.** (2011) *Globalization and Borders: Death at the Global Frontier*. London: Palgrave.
